1     **Quantification of malaria antigens PfHRP2 and pLDH by quantitative suspension**  
2                     **array technology in whole blood, dried blood spot and plasma**

3     **Authors:** Xavier Martiáñez-Vendrell<sup>1</sup>, Alfons Jiménez<sup>1,2</sup>, Ana Vásquez<sup>3</sup>, Ana  
4     Campillo<sup>4</sup>, Sandra Incardona<sup>4</sup>, Raquel González<sup>1,5</sup>, Dionicia Gamboa<sup>6</sup>, Katherine  
5     Torres<sup>7</sup>, Wellington Oyibo<sup>8</sup>, Babacar Faye<sup>9</sup>, Eusebio Macete<sup>5</sup>, Clara Menéndez<sup>1,5</sup>,  
6     Xavier C. Ding<sup>4</sup>, Alfredo Mayor<sup>1,5\*</sup>.

7     **Authors' affiliation:** <sup>1</sup> ISGlobal, Hospital Clínic of Barcelona, Universitat de  
8     Barcelona, Barcelona, 08036, Spain; <sup>2</sup> Spanish Consortium for Research in  
9     Epidemiology and Public Health (CIBERESP), Madrid, Spain; <sup>3</sup> Grupo Malaria,  
10    Facultad de Medicina, Universidad de Antioquia, Medellín, Colombia; <sup>4</sup> FIND, Geneva,  
11    Switzerland; <sup>5</sup> Centro de Investigação em Saúde da Manhiça (CISM), Maputo,  
12    Mozambique; <sup>6</sup> Departamento de Ciencias Celulares y Moleculares, Facultad de  
13    Ciencias y Filosofía, Universidad Peruana Cayetano Heredia, Lima, Peru; <sup>7</sup> Universidad  
14    Peruana Cayetano Heredia, Laboratorio de Malaria, Laboratorios de Investigacion y  
15    Dessarrollo, Facultad de Ciencias y Filosofia, Lima, Peru; <sup>8</sup> ANDI Centre of Excellence  
16    for Malaria Diagnosis, College of Medicine, University of Lagos, Idi-Aaraba, Lagos,  
17    Nigeria.; <sup>9</sup> Service de Parasitologie-Mycologie, Faculté de Médecine, Pharmacie et  
18    Odontologie, Université Cheikh Anta Diop de Dakar, Dakar, Sénégal.

19

20    **Author email addresses:** Xavier Martiáñez-Vendrell ([xavier.martianez@isglobal.org](mailto:xavier.martianez@isglobal.org));  
21    Alfons Jiménez ([alfons.jimenez@isglobal.org](mailto:alfons.jimenez@isglobal.org)); Ana Vásquez ([amvc.ana@gmail.com](mailto:amvc.ana@gmail.com));  
22    Ana Campillo ([apillu@gmail.com](mailto:apillu@gmail.com)); Sandra Incardona ([sandra.incardona@finddx.org](mailto:sandra.incardona@finddx.org));  
23    Raquel González ([raquel.gonzalez@isglobal.org](mailto:raquel.gonzalez@isglobal.org)); Dionicia Gamboa  
24    ([dionigamboa@yahoo.com](mailto:dionigamboa@yahoo.com)); Katherine Torres ([kathjess2000@yahoo.com](mailto:kathjess2000@yahoo.com)), Wellington

25 Oyibo (woyibo@unilag.edu.ng); Babacar Faye ([bfaye67@yahoo.fr](mailto:bfaye67@yahoo.fr)); Eusebio Macete  
26 ([eusebio.macete@manhica.net](mailto:eusebio.macete@manhica.net)); Clara Manéndez ([clara.menendez@isglobal.org](mailto:clara.menendez@isglobal.org));  
27 Xavier Ding (xavier.ding@finddx.org); and Alfredo Mayor  
28 ([alfredo.mayor@isglobal.org](mailto:alfredo.mayor@isglobal.org)).

29 **\*Corresponding author:** Dr. Alfredo Mayor, ISGlobal, ISGlobal, Hospital Clínic -  
30 Universitat de Barcelona, Carrer Rosselló 153 (CEK building), E-08036 Barcelona,  
31 Spain. Telephone +34 93 227 5400 - ext 4519. E-mail: [alfredo.mayor@isglobal.org](mailto:alfredo.mayor@isglobal.org)

32 **Keywords:** Malaria, Rapid Diagnostic Test, histidine-rich protein 2, parasite lactate  
33 dehydrogenase, Luminex, quantitative suspension array technology

34 **ABSTRACT**

35 **Background**

36 Malaria diagnostics by rapid diagnostic tests (RDTs) relies primarily on the qualitative  
37 detection of *Plasmodium falciparum* histidine-rich protein 2 (PfHRP2) and *Plasmodium*  
38 *sp* lactate dehydrogenase (pLDH). As novel RDTs with increased sensitivity are being  
39 developed and implemented as point of care diagnostics, highly sensitive laboratory  
40 based assays are needed for evaluating RDTs performance. Here, a quantitative  
41 suspension array technology (qSAT) was developed, validated and applied for the  
42 simultaneous detection of PfHRP2 and pLDH in a variety of clinical samples (whole  
43 blood, plasma and dried blood spots) from different endemic countries.

44 **Results**

45 The qSAT was specific for the target antigens, with analytical ranges of 6.8 to 762.8  
46 pg/ml for PfHRP2 and 78.1 to 17076.6 pg/ml for *P. falciparum* (Pf-LDH). The assay  
47 detected *P. vivax* LDH (Pv-LDH) at a lower sensitivity than Pf-LDH (analytical range  
48 of 1093.20 to 187288.5 pg/ml). Both PfHRP2 and pLDH levels determined using the  
49 qSAT showed to positively correlate with parasite densities determined by quantitative  
50 PCR (Spearman  $r=0.59$  and  $0.75$ , respectively) as well as microscopy (Spearman  $r=0.40$   
51 and  $0.75$ , respectively), suggesting the assay to be a good predictor of parasite density.

52 **Conclusion**

53 This immunoassay can be used as a reference test for the detection and quantification of  
54 PfHRP2 and pLDH, and could serve for external validation of RDTs performance, to  
55 determine antigen persistence after parasite clearance, as well as a complementary tool  
56 to assess malaria burden in endemic settings.

## 58 INTRODUCTION

59 The availability of field-deployable malaria rapid diagnostic tests (RDTs) in recent  
60 years has markedly facilitated access to malaria diagnostics. Since the World Health  
61 Organization (WHO) recommendations in 2010 to test all suspected malaria cases (1),  
62 RDTs have gained a crucial role in the management of malaria clinical cases, as well as  
63 for malaria surveillance. Malaria RDTs have supplanted conventional light microscopy  
64 in many endemic areas as the standard of practice, accounting in 2017 for 75% of all  
65 diagnostic tests done in sub-Saharan Africa, where most RDTs are distributed (66%) (2).  
66 The vast majority of RDTs used worldwide are based on the detection of parasite  
67 bioproduct histidine-rich protein 2 (PfHRP2), expressed only in *Plasmodium*  
68 *falciparum*, and the parasite metabolic enzyme lactate dehydrogenase (pLDH), present  
69 in all human-infecting *Plasmodium* species.

70 PfHRP2 is a water-soluble glycoprotein produced by the parasite throughout its asexual  
71 lifecycle and early sexual stages; it is expressed on the surface of infected erythrocytes  
72 and released into the peripheral blood circulation during schizogony (3,4). Given the  
73 ability of mature *P. falciparum* parasites to sequester in vascular beds during the last  
74 half of their asexual life-cycle, where they are not accessible for microscopic diagnosis,  
75 it has been proposed that the quantitative detection of PfHRP2 can provide a more  
76 accurate measurement of parasite biomass and potentially assist in determining the  
77 prognosis of severe malaria (5–7). During pregnancy, *P. falciparum* infections can  
78 remain undetectable in peripheral blood as the parasites sequester in the intervillous  
79 spaces of the placenta by specific adhesion to chondroitin sulphate A (8,9). In such  
80 scenario, PfHRP2-detecting RDTs have showed to have higher sensitivity on peripheral  
81 blood compared to conventional light microscopy (10), although still lower than PCR  
82 (11).

83

84 RDTs detecting PfHRP2 only are the most widely used products (12), accounting for  
85 66% of the 276 million RDTs sold worldwide in 2017 (2). Nonetheless, PfHRP2-  
86 detecting RDTs have been suggested to have limited clinical specificity for diagnosis of  
87 current malaria infection in areas of high transmission (13) and following treatment  
88 (14,15) due to the persistence of the protein in the blood circulation after parasite  
89 clearance. The time span of a positive test result following parasite clearance is mainly  
90 dependent on the duration and density of parasitaemia prior to treatment, with values  
91 ranging from 26 days in Ugandan children with parasitaemia less than 1,000 parasites  
92 per microliter (p/ $\mu$ l) up to 37 days for parasite density  $>50,000$  p/ $\mu$ l (16).

93 The parasite LDH is a metabolic enzyme required for survival and is produced by all  
94 five *Plasmodium* species infective to humans (17,18). In contrast to PfHRP2, pLDH  
95 does not persist in blood after clearance of malaria infections and is therefore a better  
96 marker of acute and current infection (19). Upon treatment, pLDH clearance in blood  
97 has been shown to closely track with that of parasites, suggesting pLDH to be a suitable  
98 predictor for treatment failure (20). However, sensitivity of RDTs based on this antigen  
99 is generally lower than that of PfHRP2-based RDTs (21).

100 Currently, enzyme-linked immunoabsorbent assay (ELISA) is the standard of practice  
101 immunoassay for the detection and quantification of PfHRP2 and pLDH, and is used as  
102 an external validation tool for RDTs performance. ELISAs are however costly, time and  
103 sample consuming, and generally only allow for the detection of one analyte at the time.  
104 The recent release of a highly-sensitive RDT for PfHRP2 (Alere<sup>TM</sup> Malaria Ag P.f),  
105 with two to ten-fold higher sensitivity than other currently available RDTs (22,23), as  
106 well as the work in progress to develop new generation pLDH-based RDTs, underpin  
107 the need for new highly-sensitive laboratory based reference immunoassays than can

108 provide lower limit of detection than classical ELISAs (24–28). Highly sensitive  
109 quantitative assays should not only be a more suitable tool for validation of new-  
110 generation RDTs, but could also be used to better understand antigen kinetics,  
111 particularly that of PfHRP2, and to support malaria surveillance. In this work, we  
112 present a high-throughput quantitative suspension array approach based on the Luminex  
113 technology that allows for the simultaneous and highly sensitive detection and  
114 quantification of PfHRP2 and pLDH antigens in different biological samples (whole  
115 blood, plasma, and dried blood spots). This assay provides an additional tool to  
116 externally evaluate the performance of new generation antigen detecting malaria RDTs,  
117 and can be used for research purposes to address biological questions such as PfHRP2  
118 persistence and the relationship between antigen levels and disease severity.

119

## 120 **MATERIALS AND METHODS**

### 121 **Development and optimization of the bead suspension array**

122 **Biotinylation of detection mAbs.** Detection monoclonal mouse IgG  $\alpha$ -PfHRP2  
123 (MBS834434, MyBioSource, San Diego, CL) and monoclonal mouse IgG  $\alpha$ -PAN-  
124 pLDH (PA-2, AccessBio, Somerset, NJ) were biotinylated using the EZ-Link Sulfo-  
125 NHS-Biotin Kit (21435, Thermo Fisher Scientific, Waltham, MA) according to the  
126 manufacturer's instructions with minor modifications (See Additional file 1: Text1).

127 **Coupling of mAbs to magnetic beads.** Coupling of magnetic microspheres was  
128 performed similarly as described elsewhere (29). Briefly, two MagPlex® microspheres  
129 (Luminex Corp., Austin, Texas) with different spectral signatures selected for the  
130 detection of PfHRP2 and PAN-pLDH were washed with distilled water and activated

131 with Sulfo-NHS (N-hydroxysulfosuccinimide) and EDC (1-ethyl-3-[3-  
132 dimethylaminopropyl] carbodiimide hydrochloride) (Pierce, Thermo Fisher Scientific  
133 Inc., Rockford, IL), both at 50 mg/mL, in activation buffer (100 mM Monobasic  
134 Sodium Phosphate, pH = 6.2). Microspheres were washed with 50 mM MES potassium  
135 salt (4-morpholineethane sulfonic acid, Sigma Aldrich, St. Louis, MO) pH 5.0 to 10000  
136 beads/ $\mu$ l, and covalently coupled with capture antibodies against PfHRP2 (MBS832975,  
137 MyBiSource, San Diego, CL) and PAN-pLDH (PA-12, AccessBio, Somerset, NJ), both  
138 at a concentration of 25  $\mu$ g/ml. Beads were incubated on a rotatory shaker overnight at 4  
139  $^{\circ}$ C and protected from light. Microspheres were blocked with PBS-BN (PBS with 1%  
140 BSA and 0.05% sodium azide (Sigma, Tres Cantos, Spain), and re-suspended in PBS-  
141 BN (from now on named assay buffer) to be quantified on a Guava PCA desktop  
142 cytometer (Guava, Hayward, CA) to determine the percentage recovery after the  
143 coupling procedure. Coupling validation was performed by incubating 50  $\mu$ l of each  
144 bead suspension (2000 beads/well) with 50  $\mu$ l  $\alpha$ -mouse IgG-Biotin (B7401-1ML, goat  
145 anti-Mouse IgG-Biotin, Sigma Aldrich, St. Louis, MO) at 1:1000 dilution in a 96-well  
146 flat bottom plate for 2 hours in gentle agitation. The plate was washed by pelleting  
147 microspheres using a magnetic separator (40-285, EMDMillipore, Burlington, MA) and  
148 re-suspended with wash buffer (0.05% Tween 20/PBS). Beads were incubated with 100  
149  $\mu$ l of streptavidin-phycoerythrin (42250-1ML, Sigma Aldrich, St. Louis, MO) diluted  
150 1:1000 in assay buffer for 30 minutes in gentle agitation in the dark. Finally, the beads  
151 were washed and re-suspended in assay buffer, and the plate was read using the  
152 Luminex xMAP<sup>®</sup> 100/200 analyser (Luminex Corp., Austin, TX). A reading higher  
153 than 25000 median fluorescence intensity (MFI) implied a successful coupling reaction.  
154 Coupled beads were stored multiplexed at a concentration of 1000 beads/ $\mu$ l/region at 4  
155  $^{\circ}$ C and protected from light.

156 To optimize the coupling concentration of detection antibodies, a concentration range  
157 from 10 to 100 µg/ml of  $\alpha$ -PfHRP2 and  $\alpha$ -PAN-pLDH monoclonal antibodies (mAbs)  
158 was conjugated to magnetic beads, and assayed against serially diluted recombinant  
159 PfHRP2 and pLDH and a selection of plasma samples from *P. falciparum* positive  
160 individuals. The mAb concentration that provided the highest the MFI values was  
161 selected as the optimal concentration.

162 **PfHRP2 and pLDH reference materials.** Recombinant PfHRP2 protein type A from  
163 FCQ79 *P. falciparum* strain expressed in *Escherichia coli* (890015, Microcoat GmbH,  
164 Germany) was selected as PfHRP2 reference material. Antigen concentration after  
165 reconstitution was determined by ELISA (Malaria Ag CELISA, CeLLabs). Purified  
166 recombinant *P. falciparum* and *P. vivax* pLDH proteins expressed in insect cells (3001,  
167 ReliaTech GmbH, Germany) were used as reference material. The pLDH concentrations  
168 were measured in a previous study using a commercially available ELISA (QUALISA  
169 Malaria kit, Qualpro Diagnostics, India) (21). Reference materials were used to prepare  
170 the standard curves for the bead suspension array, starting at concentrations of 50 ng/ml  
171 for PfHRP2 type A and at 1000 ng/ml for *P. falciparum* and *P. vivax* pLDH. The WHO  
172 International Standard for *Plasmodium falciparum* antigens was provided by the  
173 National Institute for Biological Standards and Control (Ridge, UK) (NIBSC code:  
174 16/376, (30)). The WHO International Standard for *P. falciparum* antigens was  
175 quantified, and the obtained antigen concentrations in pg/ml were used to calculate the  
176 number of antigen picograms corresponding to 1 International Unit (IU).

177 **Optimization of assay standard curves.** Standard curves were prepared for the  
178 detection of PfHRP2 and pLDH. The conjugated beads were incubated with serial  
179 dilutions of recombinant PfHRP2 types A, B and C and recombinant *Pf* and *Pv* pLDH  
180 in assay buffer to produce standard curves ranging from 50,000 to 0.024 pg/ml for



181 PfHRP2, and from 1,000,000 to 0.48 for both *P. falciparum* pLDH and *Pv* pLDH  
182 (Figure 1B) (for a more detailed assay procedure, see Additional file 1: Text2).

### 183 **Assay parameters**

184 **Limit of detection, limits of quantification and range.** A calibration curve prepared  
185 with serially diluted reference PfHRP2 and *P. falciparum* pLDH was assayed in 66 runs  
186 on the Luminex xMAP® 100/200 analyser, along with 2 blank samples (consisting of  
187 assay buffer alone) per run. For *Pv* pLDH, serial dilutions of reference antigen were  
188 assayed in 6 independent runs. The lower limits of detection (LLOD), defined as lowest  
189 amount of analyte which can be detected, and of quantification (LLOQ), defined as the  
190 lowest concentration of an analyte in a sample that can be quantified, were determined  
191 by measuring the MFI of 132 wells containing blank samples. The upper limit of  
192 quantification (ULOQ), corresponding to the highest concentration that can be  
193 quantitatively determined, was defined as the maximum value of the fitted mean  
194 standard curve minus its 10% to avoid quantifying samples falling close to the  
195 saturation plateau. The analytical range was set within the lower and the upper limits of  
196 quantification.

197 To quantify the LLOD and the LLOQ, 3 and 6 standard deviations (SD) were added to  
198 the mean MFI of blanks (n = 132), respectively. Each calibration or standard curve was  
199 fitted using a five parameters logistic (5PL) regression, and the mean curve was  
200 calculated. To present the LLOD and the LLOQ as concentration values, the calculated  
201 MFI values were interpolated to the mean calibration curve.

202 **Dilution linearity and accuracy.** Dilution linearity and accuracy were evaluated on the  
203 same serial dilutions of recombinant PfHRP2 type A and *P. falciparum* pLDH read over  
204 66 independent runs. Dilution linearity was calculated as the mean percent change in

205 dilution-corrected concentration from one dilution to the previous one within the assay  
206 range. Dilution linearity was considered acceptable if the percent change in  
207 concentration did not exceed the recovery range of 80-120%. Accuracy was determined  
208 as the mean percent deviation (% DEV) from the expected concentration, calculated by  
209 dividing the difference between the experimental value and the expected value and then  
210 multiplying by 100. Acceptable accuracy was defined as the %DEV not surpassing by  
211 20% the expected concentration (by 25% for samples with concentrations falling at the  
212 LLOQ and ULOQ).

213 **Precision.** Intra-assay and inter-assay precision were evaluated by assaying cultured *P.*  
214 *falciparum* W2 strain spiked in assay buffer at five dilutions spanning a wide range of  
215 antigen concentration in triplicate over four runs. Intra-assay precision over the four  
216 runs was defined as the average coefficient of variation (% CV) of individual samples.  
217 The % CV for each sample was calculated by determining the standard deviation (SD)  
218 of the three replicate results, dividing it by the mean of the triplicate results, and  
219 multiplying by 100. Inter-assay precision was defined as the overall % CV, calculated  
220 by dividing the SD of plate means by the mean of plate means and then multiplying by  
221 100. Calculations were performed on non-transformed MFI values. Precision was  
222 considered acceptable when % CV did not exceed 10% for intra-assay variation and  
223 20% for inter-assay variation (30).

224 **Selectivity.** To investigate the selectivity of the assay for the target antigens, 75 plasma  
225 samples from 25 Spanish pregnant women never exposed to malaria were assayed to  
226 demonstrate that the bead suspension array does not detect plasma components other  
227 than the target antigens (PfHRP2 and pLDH).

228 **Study samples**

229 To test against samples collected in endemic areas, different sample sets were assayed  
230 (characteristics of clinical samples used are summarized in Table 1).

231 ***Plasmodium falciparum* culture samples and *P. vivax* clinical samples.** W2, Benin I,  
232 Borneo and Santa Lucia *P. falciparum* strains were cultured under standard hypoxic  
233 conditions. Culture in exponential growth phase was harvested, infected red blood cells  
234 were spun down, aliquoted, and frozen at -80 °C as previously described (21).  
235 *Plasmodium vivax* isolates were collected from symptomatic adult volunteers with a *P.*  
236 *vivax* mono-species infection as confirmed by microscopy during a specimen collection  
237 campaign organized in April 2016 in the area of Iquitos (Peru).

238 **Plasma and serum samples.** PfHRP2 and pLDH were measured in 765 plasma  
239 samples collected at 3 time points during pregnancy from 255 pregnant women residing  
240 in Manhica (Southern Mozambique) who participated in a clinical trial of intermittent  
241 preventive treatment during pregnancy (IPTp) from 2010 to 2012 (31,32), and in 103  
242 serum samples from 77 pregnant women in the Urabá-Antioquia region (Colombia)  
243 collected between 2005 and 2007 (33). Additionally, 75 plasma samples collected at 3  
244 time points from 25 pregnant women never exposed to malaria, who attended the  
245 Hospital Clínic of Barcelona during pregnancy and delivery in 2010, were included in  
246 the assay as negative controls. Plasma and serum samples were stored at -80 °C.  
247 Infection status and parasite densities were previously determined by qPCR on DBS for  
248 samples from Mozambique (34), and by light microscopy (LM) in Colombian samples.

249 **Whole blood samples.** EDTA-anticoagulated whole blood samples were collected from  
250 consenting asymptomatic adults with no recent clinical episode of malaria (past four  
251 weeks) during cross-sectional surveys in Peru (35), and Senegal. Samples were assessed  
252 and categorized as *P. falciparum* mono-species infection or *Plasmodium* negative  
253 samples using nested PCR, and parasitaemia was quantified using quantitative PCR as

254 described previously at the Hospital for Tropical Diseases (UK) (36). The *pfhrp2* gene  
255 status of *P. falciparum* PCR positive samples was investigated by PCR as previously  
256 described (37). Whole blood samples from asymptomatic adults were used to prepare  
257 dried blood spots (DBS) (See Additional file 1: Text4). EDTA-anticoagulated whole  
258 blood samples were collected between March and October 2017 in Peru Amazon region  
259 and Nigeria Lagos state from consenting symptomatic (with fever within the last 3 days)  
260 and asymptomatic (no fever history in past 3 days) patients enrolled during a clinical  
261 trial of a new multiplex fever diagnostic test. Antigens were quantified in those samples  
262 that were positive for *P. falciparum* by PCR (n= 323 in Peru and 629 in Nigeria).  
263 Individuals participating in this clinical trial had been previously tested by on-site  
264 microscopy (final result based on reading from 2 independent microscopists), and by  
265 SD BIOLINE Malaria Ag P.f (HRP2/pLDH) (05FK90, Abbott, Chicago, IL) in Nigeria  
266 and by CareStart™ Malaria Pf/PAN (HRP2/pLDH) (RMRM-02571) and Carestart  
267 Pf/PAN (pLDH) Ag (RMLM-02571) (AccessBio, Somerset, NJ) RDTs in Peru.

## 268 **Statistical analysis**

269 The relationship between the MFIs in singleplex and multiplex assays and the  
270 correlation between parasite densities and antigen levels were assessed by the non-  
271 parametric Spearman's rank correlation method. Statistical analyses were performed  
272 with GraphPad Prism (version 6, Graphpad, Inc). The 95% confidence intervals (CI  
273 95%) for sensitivity and specificity were calculated by Wilson score method in  
274 Microsoft Excel (2013).

275

## 276 **RESULTS**

277 **Development of the bead suspension array for PfHRP2 and pLDH**

278 **detection**

279 **Optimization of standard curves for the detection of PfHRP2 and pLDH.** The  
280 coupling conditions were optimized based on a concentration range of 10 to 100 ug/mL  
281 of coupled HRP2 and pan-pLDH antibodies and testing with recombinant antigens as  
282 well as plasma samples from *Pf* infected pregnant women, showing slightly higher MFI  
283 values at 25 ug/mL (data not shown). A range of in-house biotinylated detection mAbs  
284 was tested, and the optimal concentration was found to be 1 µg/ml for the detection of  
285 both antigens (data not shown).

286 PfHRP2 type A, slightly higher MFI values were obtained for type A compared to types  
287 B and C (See Additional file 2: Figure S1A), similarly to previously reported data  
288 (24,25). PfHRP2 type A was selected as reference material. Recombinant *P. falciparum*  
289 pLDH was detected down to lower concentrations compared to *Pv* pLDH, indicating  
290 higher assay sensitivity for the detection of recombinant *P. falciparum* pLDH (Figure  
291 1B). Similarly, the assay was able to detect lower concentrations of native *P. falciparum*  
292 pLDH compared to *P. vivax* pLDH (See Additional file 2: Figure S1B). Additionally,  
293 the detection of PfHRP2 and pLDH in assay buffer spiked with recombinant proteins,  
294 cultured parasites or plasma samples yielded similar MFI values in singleplex and  
295 multiplex (See Additional file 2: Figure S1C), with a clear correlation for both PfHRP2  
296 (n = 25, r = 0.995; p < 0.001) and pLDH (n = 31, r = 0.992; p < 0.001), indicating no  
297 cross-reactivity between PfHRP2 and pLDH components.

298 **Correspondence to International Units.** In the qSAT assay presented here, 1 IU  
299 PfHRP2 corresponds to 23.5 pg PfHRP2, whereas 1 IU pLDH corresponds to 160 pg/ml  
300 pLDH.

## 301 **Assay parameters**

302 **Limit of detection, limits of quantification and range.** The lower limit of detection  
303 (LLOD) of the assay was determined to be 6.0, 56.1 and 1093.20 pg/ml for recombinant  
304 PfHRP2 type A, *P. falciparum* pLDH and *P. vivax* pLDH respectively; and the lower  
305 limit of the quantification (LLOQ) was estimated at 6.8 pg/ml for PfHRP2, 78.1 pg/ml  
306 for *P. falciparum* pLDH and 1343.5 pg/ml for *P. vivax* pLDH. The ULOQ was found to  
307 be 762.8 pg/ml, 17076.6 pg/ml and 187288.5 pg/ml for PfHRP2, *P. falciparum* pLDH  
308 and *P. vivax* pLDH, respectively. The limits of detection for PfHRP2 types B and C  
309 were 17.2 pg/ml and 15.8 pg/ml, respectively.

310 **Dilution linearity and accuracy.** The mean percent change in dilution-corrected  
311 concentration between contiguous dilutions was 13.6 and 11.1% for PfHRP2 and *P.*  
312 *falciparum* pLDH, respectively, as determined over 66 independent runs. These data are  
313 within the acceptance criteria of +/- 20% (38). However, at concentrations close to the  
314 ULOQ, the percent change showed an overestimation greater than 20% for both  
315 PfHRP2 and *P. falciparum* pLDH (Table 2). The overall percent deviation between the  
316 experimental concentration and the expected concentration for each serial dilution point  
317 falling within or close to the analytical range was 19.6 and 16.4% for PfHRP2 and  
318 pLDH, respectively. At concentrations falling at the LLOQ and the ULOQ, accuracy  
319 decreased both for PfHRP2 and *P. falciparum* pLDH detection as shown in Table 2.

320 **Precision.** Intra-assay variation was 8.3% and 9.8% for PfHRP2 and pLDH,  
321 respectively. The inter-assay %CV was 8.4% for the detection of PfHRP2 and 11.2%  
322 for the detection of pLDH. For both antigens, intra-assay and inter-assay variation fell  
323 within the acceptance criteria of 15% and of 20 % variation, respectively (30).

## 324 **PfHRP2 and pLDH recovery from dried blood spots**

325 To determine the loss of antigen when recovering PfHRP2 and pLDH from filter papers  
326 as compared to same volumes of whole blood samples, DBS were prepared with whole  
327 blood samples from Senegalese and Peruvian asymptomatic individuals (See Table 1).  
328 Blood was eluted from DBS in assay buffer (See Additional file 1: Text4) and eluted  
329 samples were assayed on the bead-suspension array along with the original whole blood  
330 samples used to prepare the DBS. The geometric mean antigen concentration obtained  
331 from DBS eluted product was 0.04 ng/ml (95% CI 0.03-0.07 ng/ml) for pHRP2 and  
332 0.10 ng/ml (95% CI 0.06-0.16 ng/ml) for pLDH. These concentrations are 22.8 (n=38,  
333 95% CI 15.6-33.5) and 59.7 (n=18, 95% CI 35.4-100.6) times lower than the  
334 concentrations obtained in whole blood for PfHRP2 and pLDH, respectively (0.77  
335 ng/ml (95% CI 0.37-1.61 ng/ml) for PfHRP2 and 5.77 ng/ml (95% CI 2.45-13.57  
336 ng/ml) for pLDH), for identical blood volumes.

### 337 **Assay selectivity for the target antigens**

338 An important step in the development of the assay was to investigate whether it was  
339 selective for the target antigens. Significant MFI signal for PfHRP2 and pLDH was  
340 observed in *P. falciparum* positive samples (PfHRP2: Mean = 10195, SD = 12545;  
341 pLDH: Mean = 9634, SD = 11765), whereas positive *P. vivax* samples (n=12) only  
342 showed fluorescence signal for pLDH (Mean = 12960; SD = 3735), and not for PfHRP2  
343 (Mean = 75.0, SD = 39.3) as expected (Figure 2). Five out of 71 and seven out of 738  
344 negative samples by microscopy and PCR, respectively, showed MFI values above the  
345 LLOQ for both PfHRP2 and pLDH, and four other *P. falciparum* positive samples by  
346 microscopy and four *P. falciparum* positive samples by qPCR yielded greater MFI  
347 values than the LLOQ for pLDH and PfHRP2 respectively. In addition, two *P.*  
348 *falciparum* positive samples with *pfhrp2* deletion showed MFI values above the LLOQ.

349 Finally, all plasma samples (n=75) from Spanish malaria naïve pregnant women yielded  
350 negligible fluorescence signals for both antigens (Figure 2).

### 351 **Correlation between antigen levels and parasite densities**

352 In samples positive for one or two antigens, the correlation between antigen  
353 concentrations and parasite densities was investigated. Overall, a significant correlation  
354 between PfHRP2 and parasite densities was found regardless of whether parasite  
355 densities were quantified by qPCR (Spearman  $r = 0.59$ ;  $p < 0.0001$ ) or microscopy  
356 (Spearman  $r = 0.40$ ;  $p < 0.0001$ ) (Figure 3). pLDH levels showed a higher correlation  
357 with parasite densities compared to PfHRP2, both in samples for which densities were  
358 determined by qPCR (Spearman  $r = 0.75$ ;  $p < 0.0001$ ) and by microscopy (Spearman  $r =$   
359  $0.75$ ;  $p < 0.0001$ ) (Figure 3). The correlation between parasite densities and antigen  
360 levels differed across the different sample sets analysed (See Additional file 3: Table  
361 S1). Interestingly, the correlation between pLDH levels with parasite densities in whole  
362 blood samples from Peru (Spearman  $r = 0.76$ ;  $p < 0.0001$ ) and Nigeria (Spearman  $r =$   
363  $0.78$ ;  $p < 0.0001$ ) was very similar, whereas for PfHRP2, a better correlation with  
364 parasite densities was found in samples from Nigeria (Spearman  $r = 0.47$ ;  $p < 0.0001$ )  
365 compared to samples from Peru (Spearman  $r = 0.20$ ;  $p = 0.0308$ ).

366

### 367 **DISCUSSION**

368 In the present study, we have established a quantitative suspension array based on  
369 Luminex technology for the simultaneous detection and quantification of *P. falciparum*  
370 HRP2 and *P. falciparum* and *P. vivax* pLDH, which allows to determine protein  
371 concentrations as low as 6.0, 56.1 and 1042.7 pg/ml, respectively. Hence, the assay  
372 provides increased sensitivity compared to commercially available ELISA kits which



373 have LODs of approximately 400 pg/ml and 1000 pg/ml for PfHRP2 and pLDH,  
374 respectively (27,39). The assay shows good levels of dilution linearity, accuracy and  
375 precision, and can be used to effectively and rapidly quantify malaria antigens in large  
376 quantities of different biosamples.

377 The performance of the bead suspension array to quantify PfHRP2 and pLDH was  
378 evaluated using reference recombinant proteins as well as cultured parasites, and in  
379 different biofluids from malaria exposed and malaria naïve individuals. The assay is  
380 selective for the target antigens and has an analytical range of 6.8 to 762.8 and of 78.1  
381 to 17076.6 pg/ml for PfHRP2 and *P. falciparum* pLDH, respectively. Additionally, the  
382 assay can also quantify *Pv* pLDH down to 1211.6 pg/ml. The assay analytical sensitivity  
383 to detect PfHRP2 is comparable to that of a recently developed bead suspension assay  
384 based on Luminex technology (25), as well as to other immunoassays that use different  
385 technologies (20,28). This suggests that with the current technology available for the  
386 quantification of PfHRP2 using antibodies, the lowest limit of detection achievable is in  
387 the range of 0.5 to 10 pg/ml. The limit of detection for pLDH is more divergent across  
388 assays, ranging from approximately 10 pg/ml (28) up to 4000 pg/ml (25), but in all  
389 assays it is always higher than that for PfHRP2. This underpins the need to further  
390 improve the sensitivity of pLDH-based diagnostics.

391 The bead suspension array described here can successfully be used as for detection and  
392 quantification of PfHRP2 and pLDH in whole blood, eluted DBS and plasma or serum  
393 samples. The concentration of eluted PfHRP2 from DBS to be equivalent to  
394 approximately a 1:20 dilution from whole blood, similarly to previously reported data  
395 (40). Differently, for pLDH we found that antigen concentration in eluted DBS  
396 corresponds to a 1:60 whole blood dilution, which differs from previously published  
397 data showing no differences in antigen recovery between PfHRP2 and pLDH (20).

398 However, such differences could be explained by the different extraction methodologies  
399 and storage conditions used.

400 The quantification of PfHRP2 and pLDH is performed by interpolating MFI values to a  
401 regression curve fitted from a calibration curve consisting of recombinant proteins  
402 PfHRP2 type A and *P. falciparum* pLDH. Particularly for PfHRP2, the use of a single  
403 recombinant protein as a reference material to quantify antigen levels in field samples  
404 may provide an approximate estimate of the true concentration. PfHRP2 contains  
405 sequences rich in histidine that form the epitopes targeted by the mAbs in RDTs (41),  
406 which have been shown to be highly polymorphic in sequence composition of the  
407 repeated motifs, as well as in overall length and number of repeated motifs between  
408 different parasite strains (41). Baker *et al.* classified PfHRP2 as types A, B, or C  
409 depending on the frequency of two epitope repeats (named type 2 and type 7) which  
410 confer increased reactivity to mAbs in RDTs (41,42). According to this classification,  
411 PfHRP2 Type A comprises the higher number of repeat types 2 and 7, followed by  
412 PfHRP2 Type B, and finally PfHRP2 Type C. Our results on the detection of different  
413 PfHRP2 types (See Additional file 2: Figure S1A) align with this data and resemble  
414 recently published results (24,25).

415 We observed an overall positive significant correlation between antigen levels and  
416 parasite densities similar to what previous studies have found (24), although the  
417 correlation was different among the groups of samples analysed (See Additional file 3:  
418 Table S1), probably because of the type of sample used for antigen quantification,  
419 operational variations and sample storage. Of note, pLDH better correlated with parasite  
420 densities compared to PfHRP2. This finding can be explained by the fact that PfHRP2,  
421 differently from pLDH, is secreted to the blood stream and persists in circulation for  
422 several days. In addition, we observed that the correlation between PfHRP2 and parasite

423 densities was lower in samples from Peru compared to samples from Nigeria, whereas  
424 pLDH levels correlated very similarly to parasite densities in both groups of samples.  
425 The high number of suspected *P. falciparum* positive samples with *pfhrp2* gene  
426 deletions within the group of samples from Peru most probably explains this finding.

## 427 **CONCLUSIONS**

428 The quantitative suspension array technology presented here allows for a simultaneous  
429 highly sensitive detection of the most commonly used target antigens in malaria RDTs.  
430 The assay could be used as a tool to validate next generation RDTs, as well as to  
431 estimate malaria burden in endemic areas and to evaluate the impact of malaria control  
432 activities. Finally, this assay has the potential to be further upgraded by multiplexing the  
433 detection and quantification of antibodies against parasite antigens that could serve as a  
434 supplementary tool to study malaria transmission intensity, as well as the detection of  
435 other infectious diseases antigens.

## 436 **Abbreviations**

437  $\alpha$ : anti; Ag: antigen; CI: confidence intervals; DBS: dried blood spot; EDC: 1-Ethyl-3-  
438 [3-dimethylaminopropyl] carbodimide hydrochloride; ELISA: enzyme-linked  
439 immunoabsorbent assay; GM: Geometric mean; IgG: immunoglobulin G; LLOD: lower  
440 limit of detection; LLOQ: lower limit of quantification; LM: light microscopy; mAbs:  
441 monoclonal antibodies; MFI: median fluorescence intensity; p/ $\mu$ l: parasites per  
442 microliter; PCR: polymerase chain reaction; *Pf*: Plasmodium falciparum; pg/ml:  
443 pictograms per millilitre; PfHRP2: Plasmodium falciparum histidine-rich protein 2;  
444 PfHRP3: Plasmodium falciparum histidine-rich protein 3; pLDH: parasite lactate  
445 dehydrogenase; *Pv*: Plasmodium vivax; qPCR: quantitative polymerase chain reaction;  
446 qSAT: quantitative suspension array technology; RDT: rapid diagnostic test; RT: room

447 temperature; SD: standard deviation; Sulfo-NHS (N-hydroxysulfosuccinimide); ULOQ:  
448 upper limit of quantification;  $\mu$ l: microliter; 5PL: five parameters logistic;  $^{\circ}$ C: degrees  
449 Celsius; %CV: percent coefficient of variation; %DEV: percent deviation.

## 450 **Declarations**

### 451 **Authors' contributions**

452 AM and AC conceived and designed the study. CM, EM, ES and RG obtained the  
453 plasma samples from Mozambican pregnant women. AV obtained the serum samples  
454 from Colombian pregnant women. XD and SD were in charge of studies that allowed  
455 collecting the whole blood samples from Senegalese and Peruvian asymptomatic  
456 patients, and from Nigerian and Peruvian febrile patients, respectively. AJ and XMV  
457 performed all laboratory experiments. AJ, AM and XMV performed the statistical  
458 analyses and manuscript preparation. AC, AM, IG and XD provided overall study  
459 supervision. All authors read and approved the final manuscript.

### 460 **Acknowledgements**

461 We thank the study participants; the staff of the Hospitals, clinical officers, field  
462 supervisors and data managers. We acknowledge the teams at CISM in Mozambique, at  
463 University of Antioquia in Colombia, at University Cheikh Anta Diop in Senegal, at  
464 Universidad Peruana Cayetano Heredia in Peru, and at University of Lagos in Nigeria,  
465 who conducted the recruitment of participants and sample processing. We would also  
466 like to thank Iveth González, Aida Valmaseda, Marta Vidal and Himanshu Gupta for  
467 providing important inputs for optimization of the quantitative bead suspension array;  
468 and Laura Puyol, Diana Barrios and Pau Cisteró for providing logistic support. The  
469 CISM is supported by the Government of Mozambique and the Spanish Agency for

470 International Development (AECID). ISGlobal is a member of the CERCA Programme,  
471 Generalitat de Catalunya.

472 **Competing interests**

473 The authors declare that they have no competing interests.

474 **Availability of data and material**

475 The datasets used and/or analysed during the current study are available from the  
476 corresponding author on reasonable request.

477 **Consent for publication**

478 Not applicable.

479 **Ethics approval and consent to participate**

480 The Mozambican National Health and Bioethics Committee, the Medical Research  
481 Center Ethics Committee at the Medicine Faculty of Universidad de Antioquia and the  
482 Hospital Clinic of Barcelona Ethics Committee approved the use of non-identifiable  
483 plasma and serum samples in the current study. Written informed consent was obtained  
484 from all participants.

485 The Senegal National Ethics Committee (Comité National d’Ethique pour la Recherche  
486 en Santé) reviewed and approved on 15 January 2015 the study protocol associated with  
487 the collection of whole blood specimens from consenting asymptomatic adults in  
488 Senegal to support the development and evaluation of new assays for the detection of  
489 malaria infections (Protocol SEN14/74). Written informed consent was obtained from  
490 all participants.

491 The Universidad Peruana Cayetano Heredia Institutional Review Board (Comité  
492 Institucional de Ética) reviewed and approved on 10 March 2015 the study protocol  
493 associated with the collection of whole blood specimens from consenting asymptomatic  
494 adults in Peru to support the development and evaluation of new assays for the detection  
495 of malaria infections (Protocol 100-02-15). Written informed consent was obtained  
496 from all participants.

497 The study protocol for the evaluation of a multiplex fever diagnostic test was submitted  
498 for ethics approval in October 2016 and December 2016 in Peru and Nigeria,  
499 respectively, and approvals were obtained in November 2016 in Peru, and January 2017  
500 in Nigeria. Informed consent was obtained from all participants or by legal guardians in  
501 cases of underage participants.

502 The institutional review board at the Universidad Peruana Cayetano Heredia (Lima,  
503 Peru) approved the study protocol the specimen collection campaign organized in April  
504 2016 in the area of Iquitos (Peru).

#### 505 **Funding**

506 This research was supported by FIND using funds from the Australian Government, the  
507 European and Developing Countries Clinical Trials Partnership (EDCTP), the Malaria  
508 in Pregnancy (MiP) Consortium and the Department d'Universitats i Recerca de la  
509 Generalitat de Catalunya (AGAUR; 2017SGR664).

## 510 REFERENCES

- 511 1. Olumese P. FOR THE TREATMENT OF MALARIA GUIDELINES WHO  
512 Library Cataloguing-in-Publication Data.
- 513 2. Health Organization W. WORLD MALARIA REPORT 2018 ISBN 978 92 4  
514 156565 3.
- 515 3. Biswas S, Tomar D, Rao DN. Investigation of the kinetics of histidine-rich  
516 protein 2 and of the antibody responses to this antigen, in a group of malaria  
517 patients from India. *Ann Trop Med Parasitol*. 2005 Sep 18;99(6):553–62.
- 518 4. Desakorn V, Silamut K, Angus B, Sahassananda D, Chotivanich K,  
519 Suntharasamai P, et al. Semi-quantitative measurement of *Plasmodium*  
520 *falciparum* antigen PfHRP2 in blood and plasma. *Trans R Soc Trop Med Hyg*.  
521 91(4):479–83.
- 522 5. Dondorp AM, Desakorn V, Pongtavornpinyo W, Sahassananda D, Silamut K,  
523 Chotivanich K, et al. Estimation of the Total Parasite Biomass in Acute  
524 *Falciparum* Malaria from Plasma PfHRP2. 2005;
- 525 6. Rubach MP, Mukemba J, Florence S, John B, Crookston B, Lopansri BK, et al.  
526 Plasma *Plasmodium falciparum* Histidine-Rich Protein-2 Concentrations Are  
527 Associated with Malaria Severity and Mortality in Tanzanian Children. 2012;
- 528 7. Fox LL, Taylor TE, Pensulo P, Liomba A, Mpakiza A, Varela A, et al. Histidine-  
529 Rich Protein 2 Plasma Levels Predict Progression to Cerebral Malaria in  
530 Malawian Children With *Plasmodium falciparum* Infection.
- 531 8. Fried M, Duffy PE. Adherence of *Plasmodium falciparum* to chondroitin sulfate  
532 A in the human placenta. *Science*. 1996 Jun 7;272(5267):1502–4.
- 533 9. Uneke CJ. Diagnosis of *Plasmodium falciparum* malaria in pregnancy in sub-  
534 Saharan Africa: the challenges and public health implications. *Parasitol Res*.  
535 2008 Feb 24;102(3):333–42.
- 536 10. Kattenberg JH, Tahita CM, Versteeg IAJ, Tinto H, Traoré-Coulibaly M, Schallig  
537 HDFH, et al. Antigen persistence of rapid diagnostic tests in pregnant women in  
538 Nanoro, Burkina Faso, and the implications for the diagnosis of malaria in  
539 pregnancy. *Trop Med Int Heal*. 2012 May;17(5):550–7.
- 540 11. Mayor A, Moro L, Aguilar R, Bardají A, Cisteró P, Serra-Casas E, et al. How  
541 Hidden Can Malaria Be in Pregnant Women? Diagnosis by Microscopy,  
542 Placental Histology, Polymerase Chain Reaction and Detection of Histidine-Rich  
543 Protein 2 in Plasma. *Clin Infect Dis*. 2012 Jun 1;54(11):1561–8.
- 544 12. World Health Organization., Special Programme for Research and Training in  
545 Tropical Diseases., Foundation for Innovative New Diagnostics., Centers for  
546 Disease Control (U.S.). Malaria rapid diagnostic test performance□: results of  
547 WHO product testing of malaria RDTs□: 4 (2012). World Health Organization  
548 on behalf of the Special Programme for Research and Training in Tropical  
549 Diseases; 2012. 126 p.
- 550 13. Abeku TA, Kristan M, Jones C, Beard J, Mueller DH, Okia M, et al.

- 551 Determinants of the accuracy of rapid diagnostic tests in malaria case  
552 management: evidence from low and moderate transmission settings in the East  
553 African highlands.
- 554 14. Houzé S, Boly MD, Le Bras J, Deloron P, Faucher J-F. PfHRP2 and PfLDH  
555 antigen detection for monitoring the efficacy of artemisinin-based combination  
556 therapy (ACT) in the treatment of uncomplicated falciparum malaria. *Mother  
557 Child Heal Trop Res Unit*.
- 558 15. Mayxay M, Pukrittayakamee S, Chotivanich K, Looareesuwan S, White NJ.  
559 Persistence of *Plasmodium falciparum* HRP-2 in successfully treated acute  
560 falciparum malaria. *Trans R Soc Trop Med Hyg*. 95(2):179–82.
- 561 16. Kyabayinze DJ, Tibenderana JK, Odong GW, Rwakimari JB, Counihan H.  
562 Operational accuracy and comparative persistent antigenicity of HRP2 rapid  
563 diagnostic tests for *Plasmodium falciparum* malaria in a hyperendemic region of  
564 Uganda. *Malar J*. 2008 Oct 29;7(1):221.
- 565 17. W. Michael Brown ‡, Charles A. Yowell §, Anna Hoard ‡, Thomas A. Vander  
566 Jagt ‡, Lucy A. Hunsaker ‡, Lorraine M. Deck □, et al. Comparative Structural  
567 Analysis and Kinetic Properties of Lactate Dehydrogenases from the Four  
568 Species of Human Malarial Parasites†. 2004;
- 569 18. Mccutchan TF, Piper RC, Makler MT. Use of Malaria Rapid Diagnostic Test to  
570 Identify *Plasmodium knowlesi* Infection.
- 571 19. Iqbal J, Siddique A, Jameel M, Hira PR. Persistent Histidine-Rich Protein 2,  
572 Parasite Lactate Dehydrogenase, and Panmalarial Antigen Reactivity after  
573 Clearance of *Plasmodium falciparum* Mono-infection. *J Clin Microbiol*.  
574 2004;42(9):4237–41.
- 575 20. Markwalter CF, Gibson LE, Mudenda L, Kimmel DW, Mbambara S, Thuma PE,  
576 et al. Characterization of *Plasmodium* Lactate Dehydrogenase and Histidine-Rich  
577 Protein 2 Clearance Patterns via Rapid On-Bead Detection from a Single Dried  
578 Blood Spot. *Am J Trop Med Hyg*. 2018;98(5):1389–96.
- 579 21. Jimenez A, Rees-Channer RR, Perera R, Gamboa D, Chiodini PL, González IJ, et  
580 al. Analytical sensitivity of current best-in-class malaria rapid diagnostic tests.  
581 *Malar J*. 2017 Mar 24;16(1):128.
- 582 22. Landier J, Haohankhunnatham W, Das S, Konghahong K, Raksuansak J,  
583 Phattharakoedbun P, et al. Operational performance of a *Plasmodium*  
584 *falciparum* ultrasensitive rapid diagnostic test for the 1 detection of asymptomatic  
585 infections in Eastern Myanmar. 2 3. *J Clin Microbiol*. 2018;
- 586 23. Das S, Jang IK, Barney B, Peck R, Rek JC, Arinaitwe E, et al. Performance of a  
587 High-Sensitivity Rapid Diagnostic Test for *Plasmodium falciparum* Malaria in  
588 Asymptomatic Individuals from Uganda and Myanmar and Naive Human  
589 Challenge Infections. *Am J Trop Med Hyg*. 2017 Nov;97(5):1540–50.
- 590 24. Rogier E, Plucinski M, Lucchi N, Mace K, Chang M, Lemoine JF, et al. Bead-  
591 based immunoassay allows sub-picogram detection of histidine-rich protein 2  
592 from *Plasmodium falciparum* and estimates reliability of malaria rapid diagnostic  
593 tests. *PLoS One*. 2017;12(2):e0172139.



- 594 25. Plucinski MM, Herman C, Jones S, Dimbu R, Fortes F, Ljolje D, et al. Screening  
595 for Pfhrp2/3-Deleted *Plasmodium falciparum*, Non-falciparum, and Low-Density  
596 Malaria Infections by a Multiplex Antigen Assay. *J Infect Dis*. 2018 Sep 7;
- 597 26. Jang IK. new multiplex assay for assessing plasmodium vivax and plasmodium  
598 falciparum infection.
- 599 27. Jang IK, Das S, Barney RS, Peck RB, Rashid A, Proux S, et al. A new highly  
600 sensitive enzyme-linked immunosorbent assay for the detection of *Plasmodium*  
601 falciparum histidine-rich protein 2 in whole blood. *Malar J*. 2018 Dec  
602 1;17(1):403.
- 603 28. Jang IK, Tyler A, Lyman C, Kahn M, Kalnoky M, Rek JC, et al. Simultaneous  
604 Quantification of *Plasmodium* Antigens and Host Factor CRP in Asymptomatic  
605 Individuals with Confirmed Malaria Using a Novel Multiplex Immunoassay. *J*  
606 *Clin Microbiol*. 2018 Nov 7;
- 607 29. Fonseca AM, Quinto L, Jiménez A, González R, Bardají A, Maculuve S, et al.  
608 Multiplexing detection of IgG against *Plasmodium falciparum* pregnancy-  
609 specific antigens. *PLoS One*. 2017;12(7):e0181150.
- 610 30. Diamandis EP, Christopoulos TK. *Immunoassay*. Academic Press; 1996. 579 p.
- 611 31. González R, Desai M, Macete E, Ouma P, Kakolwa MA, Abdulla S, et al.  
612 Intermittent preventive treatment of malaria in pregnancy with mefloquine in  
613 HIV-infected women receiving cotrimoxazole prophylaxis: a multicenter  
614 randomized placebo-controlled trial. *PLoS Med*. 2014 Sep;11(9):e1001735.
- 615 32. González R, Mombo-Ngoma G, Ouédraogo S, Kakolwa MA, Abdulla S,  
616 Accrombessi M, et al. Intermittent preventive treatment of malaria in pregnancy  
617 with mefloquine in HIV-negative women: a multicentre randomized controlled  
618 trial. *PLoS Med*. 2014 Sep;11(9):e1001733.
- 619 33. Carmona-Fonseca, Jaime; Maestre-B A. Incidencia de la malaria gestacional,  
620 congénita y placentaria en Urabá (Antioquia, Colombia), 2005–2007. *Rev*  
621 *Colomb Obstet Ginecol*. 2009;60(1):19–33.
- 622 34. Mayor A, Bardají A, Macete E, Nhampossa T, Fonseca AM, González R, et al.  
623 Changing Trends in *P. falciparum* Burden, Immunity, and Disease in Pregnancy.  
624 *N Engl J Med*. 2015 Oct 22;373(17):1607–17.
- 625 35. Serra-Casas E, Manrique P, Ding XC, Carrasco-Escobar G, Alava F, Gave A, et  
626 al. Loop-mediated isothermal DNA amplification for asymptomatic malaria  
627 detection in challenging field settings: Technical performance and pilot  
628 implementation in the Peruvian Amazon. *PLoS One*. 2017;12(10):e0185742.
- 629 36. Hopkins H, González IJ, Polley SD, Angutoko P, Ategeka J, Asiimwe C, et al.  
630 Highly sensitive detection of malaria parasitemia in a malaria-endemic setting:  
631 performance of a new loop-mediated isothermal amplification kit in a remote  
632 clinic in Uganda. *J Infect Dis*. 2013 Aug 15;208(4):645–52.
- 633 37. Berhane A, Anderson K, Mihreteab S, Gresty K, Rogier E, Mohamed S, et al.  
634 Major Threat to Malaria Control Programs by *Plasmodium falciparum* Lacking  
635 Histidine-Rich Protein 2, Eritrea. *Emerg Infect Dis*. 2018 Mar;24(3):462–70.
- 636 38. Plikaytis BD, Holder PF, Pais LB, Maslanka SE, Gheesling LL, Carlone GM.

- 637           Determination of parallelism and nonparallelism in bioassay dilution curves. *J*  
638           *Clin Microbiol.* 1994 Oct;32(10):2441–7.
- 639   39.   Waitumbi J, Awinda G, Rajasekariah G-H, Kifude C, Martin SK. Unified  
640           Parasite Lactate Dehydrogenase and Histidine-Rich Protein ELISA for  
641           Quantification of *Plasmodium falciparum*. *Am J Trop Med Hyg.* 2018 Sep  
642           1;80(4):516–22.
- 643   40.   Plucinski MM, Dimbu PR, Fortes F, Abdulla S, Ahmed S, Gutman J, et al.  
644           Posttreatment HRP2 Clearance in Patients with Uncomplicated *Plasmodium*  
645           *falciparum* Malaria. *J Infect Dis.* 2018 Feb 14;217(5):685–92.
- 646   41.   Baker J, Ho M-F, Pelecanos A, Gatton M, Chen N, Abdullah S, et al. Global  
647           sequence variation in the histidine-rich proteins 2 and 3 of *Plasmodium*  
648           *falciparum*: implications for the performance of malaria rapid diagnostic tests.  
649           *Malar J.* 2010 May 17;9(1):129.
- 650   42.   Baker J, McCarthy J, Gatton M, Kyle DE, Belizario V, Luchavez J, et al. Genetic  
651           diversity of *Plasmodium falciparum* histidine-rich protein 2 (PfHRP2) and its  
652           effect on the performance of PfHRP2-based rapid diagnostic tests. *J Infect Dis.*  
653           2005 Sep 1;192(5):870–7.
- 654
- 655

656 **ADDITIONAL FILES**

657 **Additional file 1.**

658 Format: .docx format.

659 Title of data: Supplementary Materials and Methods

660 Data: Includes “Text S1. Biotinylation of detection mAbs”, “Text S2. Bead suspension  
661 array procedure”, “Text S4. Singleplex versus Multiplex testing”, and “Text S4.  
662 Preparation and extraction of proteins from dried blood spots”

663 **Additional file 2.**

664 Format: .pdf format

665 Title of data: Supplementary figure 1.

666 Description of data:

667 **Figure S1. Assay optimization.** (A) Serial dilutions of recombinant PfHRP2 types A, B  
668 and C were assayed to determine the lowest concentration at which each antigen is  
669 detected; (B) *P. falciparum* Benin I and Borneo and *P. vivax* field isolates were assayed  
670 in a serial dilution fashion to assess differences between the analytical sensitivity for *P.*  
671 *falciparum* and *P. vivax* pLDH; (C) PfHRP2 and pLDH positive samples (plasma,  
672 cultured field isolates and recombinant proteins) were assayed in singleplex (X axes)  
673 and multiplex (Y axes).

674 **Additional file 3.**

675 Format: .docx format

676 Title of data: Supplementary Tables 1 and 2.

677 Description of data:

678 Table S1. Correlation between antigen levels and parasite densities for each group of  
679 clinical samples analysed.

680

681

682

683

684

685

686

687 **FIGURES AND TABLES**

688 **Figure 1. Calibration curves to detect PfHRP2, Pf pLDH and Pv pLDH.**  
689 Recombinant *P. falciparum* (*Pf*) HRP2 type A (A) and *Pf* (B, back line) and *P. vivax*  
690 (*Pv*) (B, grey line) pLDH were serially diluted to investigate the assay analytical range.  
691 Error bars show the standard deviation of the mean from 66 independent reads for  
692 PfHRP2 type A and *Pf* pLDH, and 12 reads for *Pv* pLDH. X axis: MFI value after

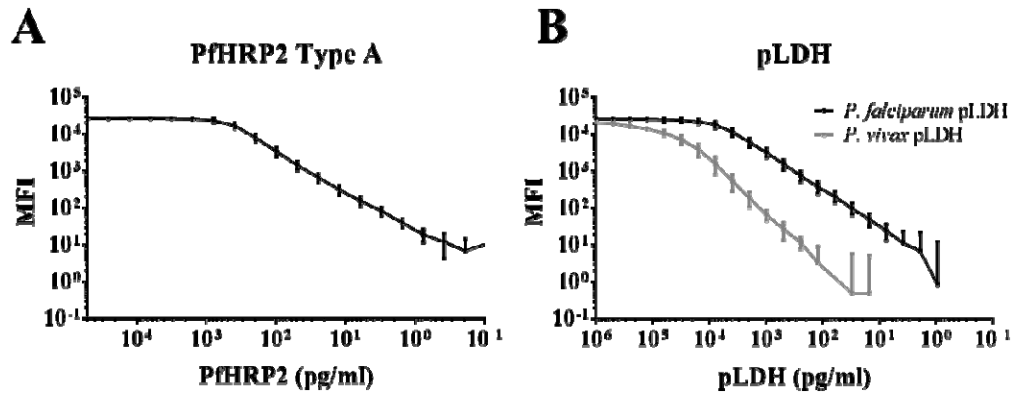

693 subtraction of the background.

694

695

696

697

698

699

700

701

702

703

704

705

706

707

708 **Figure 2. The quantitative bead suspension array is selective for PfHRP2 and**  
709 **pLDH.** Median fluorescence intensity with blank subtracted for PfHRP2 (A) and pLDH  
710 (B) for *P. falciparum* positive samples (n = 1098), *P. falciparum* with *hrp2* gene  
711 deletions (n=16), *P. vivax* positive samples (n = 12), *Plasmodium* negative samples,  
712 and samples from naïve individuals (n =75). *pfhrp2* -: *Plasmodium falciparum* with  
713 *hrp2* gene deletion.

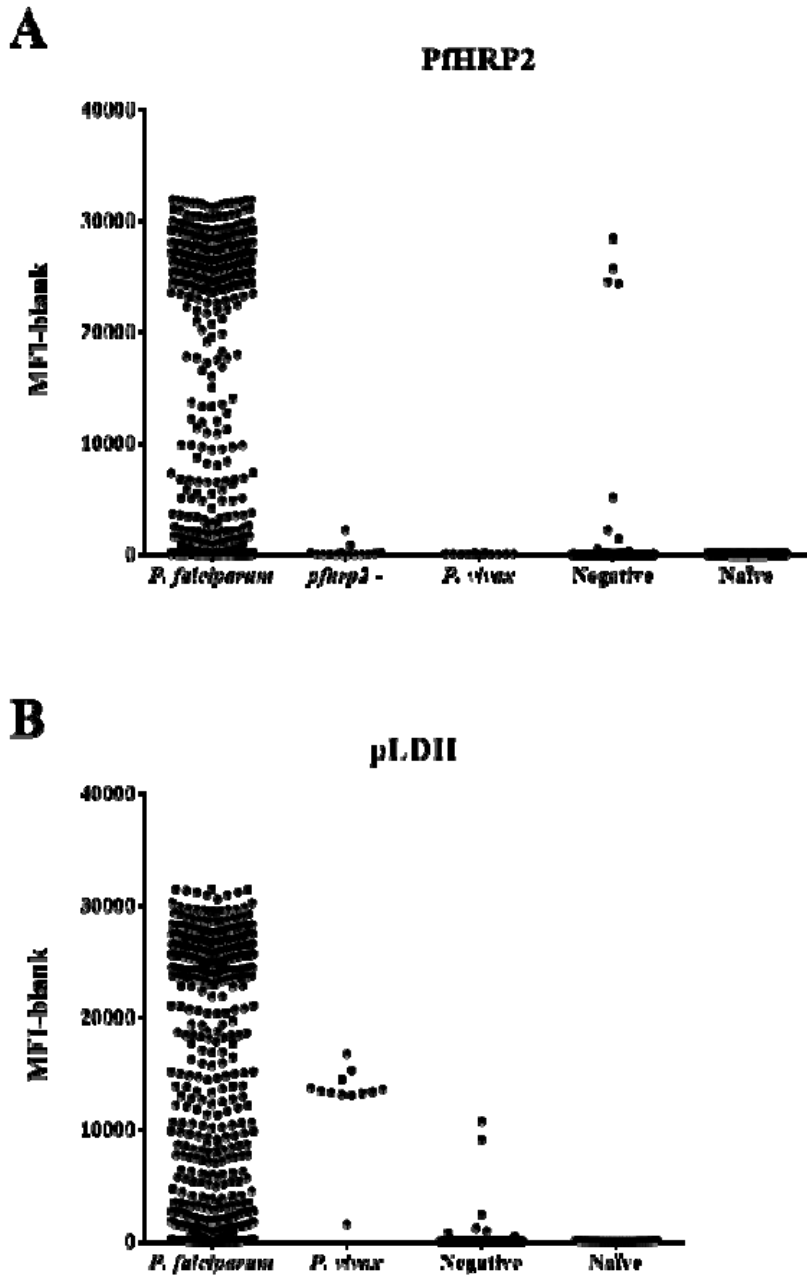

714

715

716

717 **Figure 3. Antigen levels correlate with parasite densities.** Correlation of parasite  
718 densities (p/ $\mu$ l) with PfHRP2 and pLDH concentration (pg/ml) in *P. falciparum* positive  
719 samples by PCR (A), and by microscopy (B).

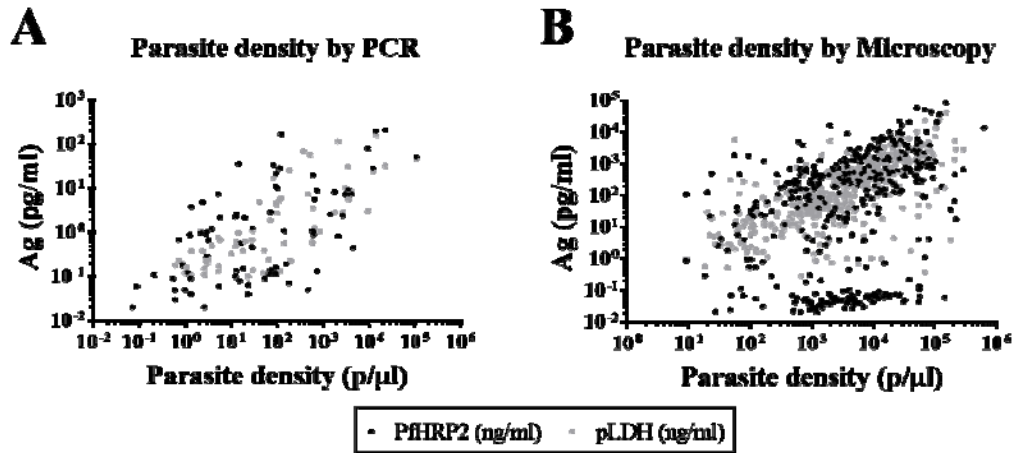

720

721

722

723

724

725

726

727

728

729

730

731

732

733

734

735





737 **Table 1. Clinical samples tested on the qSAT assay.**

| Samples (n) | Type of sample   | Origin     | Sampling period      | Population     | Reference assay            | <i>P. falciparum</i> positive (n) | GM parasite density (p/μl) (95% CI) | Others                |
|-------------|------------------|------------|----------------------|----------------|----------------------------|-----------------------------------|-------------------------------------|-----------------------|
| 765         | Plasma           | Mozambique | 2010 - 2012          | Pregnant women | qPCR on DBS                | 59                                | 127 (58.4-276.3)                    |                       |
| 103         | Serum            | Colombia   | 2005 - 2007          | Pregnant women | Microscopy                 | 32                                | 3901 (2059-7391)                    |                       |
| 110         | EDTA whole blood | Senegal    | NA                   | Adults         | Nested PCR and qPCR on WB* | 55                                | 4.9 (2.6-9.4)                       |                       |
| 16          | EDTA whole blood | Peru       | April - August 2015  | Adults         | Nested PCR and qPCR on WB* | 16                                | 52.7 (19.1-146.0)                   | <i>pfhrp2</i> deleted |
| 639         | EDTA whole blood | Nigeria    | April - August 2017  | Aged ≥5 years  | Microscopy and PCR**       | 639                               | 4713 (3530-6292)                    |                       |
| 323         | EDTA whole blood | Peru       | March - October 2017 | Aged ≥5 years  | Microscopy and PCR**       | 323                               | 1719 (1328-2225)                    |                       |
| 75          | Plasma           | Spain      | 2010                 | Pregnant women | NA                         | NA                                | NA                                  |                       |

GM: Geometric mean.

\* Nested PCR was used for species determination and qPCR for parasite density quantification. *P. falciparum* samples were positive for both methods.

\*\* PCR was used for species determination and microscopy for parasite density quantification. Geometric mean parasite densities is calculated on the basis of microscopy positive samples (n = 247/639 in Nigeria, and 191/323 in Peru).

738

739

| Sample         | <i>Pf</i> pLDH                 |          |             | PfHRP2                         |          |             |
|----------------|--------------------------------|----------|-------------|--------------------------------|----------|-------------|
|                | Expected concentration (pg/ml) | % Change | % Deviation | Expected concentration (pg/ml) | % Change | % Deviation |
| 1              | 15625                          | 41.6     | 24.2        | 781.3                          | 32.8     | 23.4        |
| 2              | 7812.5                         | 18.3     | 17.4        | 390.6                          | 18.5     | 10.8        |
| 3              | 3906.3                         | 0.9      | 17.1        | 195.3                          | 6.8      | 10.2        |
| 4              | 1953.1                         | 2        | 10.7        | 97.7                           | 0        | 8.5         |
| 5              | 976.6                          | 5.6      | 10.4        | 48.8                           | 5.2      | 10.1        |
| 6              | 488.3                          | 4.2      | 14.2        | 24.4                           | 14.7     | 19          |
| 7              | 244.1                          | 5.5      | 14.9        | 12.2                           | 12.7     | 27.9        |
| 8              | 122.1                          | 10.4     | 22.2        | 6.1                            | 18.5     | 47          |
| <b>Overall</b> | -                              | 11.1     | 16.4        | -                              | 13.6     | 19.6        |

740 **Table 2. Dilution linearity and accuracy of qSAT assay.**

741
